# Supplementary material for: Selective photocatalytic benzene hydroxylation to phenol using surface-modified Cu2O supported on graphene
Source: Royal Society of Chemistry journal article supplement (doi:10.1039/c8ta07095d), 2018-01-01

## Highly Selective Photocatalytic Benzene Hydroxylation to Phenol Using Surface-Modified Cu<sub>2</sub>O Supported on Graphene

Jinbao He,<sup>a</sup> Min Zhang,<sup>b</sup> Ana Primo,<sup>a</sup> Hermenegildo García, <sup>\*a</sup> Zhaohui Li <sup>\*b</sup>

<sup>a</sup> Instituto de Tecnología Química, Consejo Superior de Investigaciones Científicas-  
Universitat Politècnica de Valencia, Av. De los Naranjos s/n, 46022 Valencia, Spain

<sup>b</sup> Research Institute of Photocatalysis, State Key Laboratory of Photocatalysis on  
Energy and Environment, College of Chemistry, Fuzhou University, Fuzhou, 350116, P.  
R. China.

**Table S1** Conversion of benzene and formation of the products over Cu<sub>2</sub>O-8/dG under LED illumination

| Time (h) | Benzene conv.(%) | Phenol yield (%) | Phenol selec.(%) | Benzoquinone yield(%) | Mineralization (%) <sup>[a]</sup> |
|----------|------------------|------------------|------------------|-----------------------|-----------------------------------|
| 2        | 9.68             | 3.59             | 37.07            | 3.03                  | 5.29                              |
| 4        | 14.63            | 4.35             | 29.75            | 4.07                  | 8.31                              |
| 8        | 19.16            | 11.91            | 62.16            | 1.21                  | 8.02                              |
| 10       | 22.63            | 14.77            | 65.26            | 1.23                  | 8.52                              |
| 12       | 26.00            | 17.23            | 66.27            | 1.39                  | 9.19                              |
| 16       | 30.18            | 19.30            | 63.94            | 0.47                  | 10.40                             |
| 24       | 32.11            | 18.32            | 57.05            | 1.69                  | 14.22                             |

<sup>[a]</sup>Mineralization (%) = (initial amount of benzene – residual benzene – phenol – benzoquinone) / (initial amount of benzene) × 100 %

Figure S1 The spectrum of LED lamp

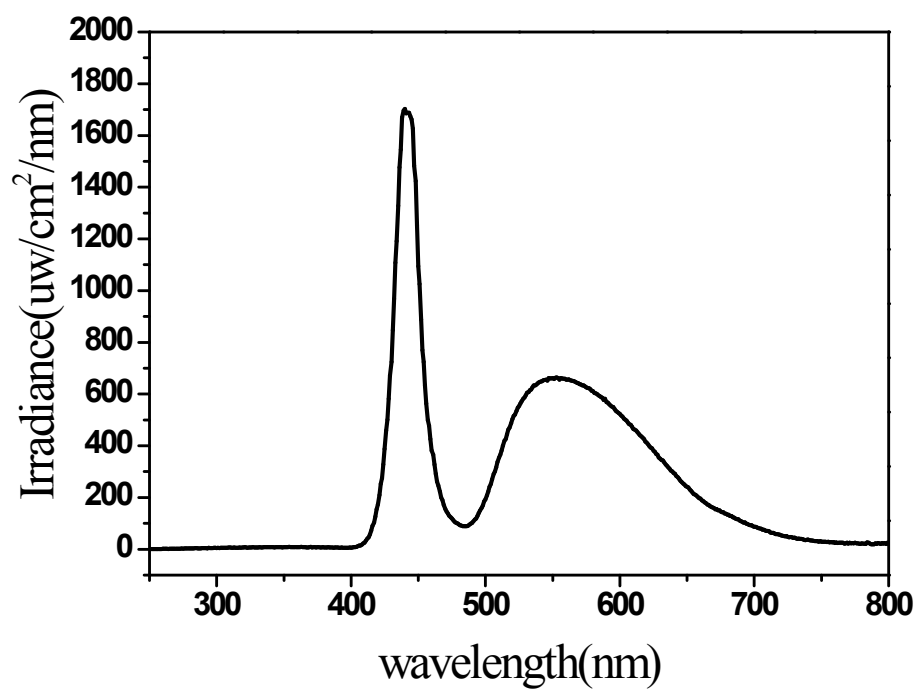

Supplement: c8ta07095d1.pdf [file c8ta07095d1.pdf]
